# Supplementary material for: Occurrence of Antimicrobial Resistance in Canine and Feline Bacterial Pathogens in Germany under the Impact of the TÄHAV Amendment in 2018
Source: MDPI journal article supplement (doi:10.3390/antibiotics12071193), 2023-07-15
Supplement: s1 [file s1]

## Descriptive analysis of examined bacterial species for agents influenced by the TÄHAV from 2015 to 2021

**Table S1: *Staphylococcus pseudintermedius***

| year                           | 2015 |          | 2016 |          | 2017 |          | 2018 |          | 2019 |          | 2020 |          | 2021 |          |
|--------------------------------|------|----------|------|----------|------|----------|------|----------|------|----------|------|----------|------|----------|
| Frequency (F)<br>Percent (P)   | F    | P        | F    | P        | F    | P        | F    | P        | F    | P        | F    | P        | F    | P        |
| total                          | 366  | 100.0    | 422  | 100.0    | 409  | 100.0    | 533  | 100.0    | 495  | 100.0    | 452  | 100.0    | 479  | 100.0    |
| dog                            | 355  | 97.0     | 407  | 96.4     | 394  | 96.3     | 510  | 95.7     | 469  | 94.7     | 428  | 94.7     | 453  | 94.6     |
| cat                            | 11   | 3.0      | 15   | 3.6      | 15   | 3.7      | 23   | 4.3      | 26   | 5.3      | 24   | 5.3      | 26   | 5.4      |
| Penicillin G                   | 286  | 78.1     | 329  | 78.0     | 296  | 72.4     | 387  | 72.6     | 352  | 71.1     | 331  | 73.2     | 322  | 67.2     |
| Ampicillin                     | 256  | 72.1/355 | 275  | 67.6/407 | 268  | 68.0/394 | 370  | 72.5/510 | 334  | 71.2/469 | 314  | 73.4/428 | 286  | 63.1/453 |
| Amoxicillin<br>Clavulanic acid | 43   | 12.0/357 | 40   | 10.0/399 | 57   | 14.8/385 | 69   | 13.4/514 | 55   | 11.5/480 | 59   | 13.6/435 | 57   | 12.2/469 |
| Cefovecin                      | 59   | 16.1     | 50   | 11.8     | 58   | 14.2     | 62   | 11.6     | 53   | 10.7     | 59   | 13.1     | 59   | 12.3     |
| Enrofloxacin                   | 45   | 12.3     | 34   | 8.1      | 53   | 13.0     | 46   | 8.6      | 35   | 7.1      | 26   | 5.8      | 34   | 7.1      |

**Table S2: *Staphylococcus felis***

| <b>year</b>                    | <b>2015</b> |         | <b>2016</b> |       | <b>2017</b> |         | <b>2018</b> |          | <b>2019</b> |       | <b>2020</b> |       | <b>2021</b> |       |
|--------------------------------|-------------|---------|-------------|-------|-------------|---------|-------------|----------|-------------|-------|-------------|-------|-------------|-------|
| Frequency (F)<br>Percent (P)   | F           | P       | F           | P     | F           | P       | F           | P        | F           | P     | F           | P     | F           | P     |
| total                          | 47          | 100.0   | 65          | 100.0 | 66          | 100.0   | 122         | 100.0    | 131         | 100.0 | 128         | 100.0 | 109         | 100.0 |
| dog                            | 1           | 2.1     | 0           | 0     | 1           | 1.5     | 3           | 2.5      | 0           | 0     | 1           | 0.8   | 1           | 0.9   |
| cat                            | 46          | 97.9    | 65          | 100.0 | 65          | 98.5    | 119         | 97.5     | 131         | 100.0 | 127         | 99.2  | 108         | 99.1  |
| Penicillin G                   | 34          | 72.3    | 32          | 49.2  | 26          | 39.4    | 44          | 36.1     | 46          | 35.1  | 39          | 30.5  | 36          | 33.0  |
| Ampicillin                     | 27          | 58.7/46 | 28          | 43.1  | 25          | 38.5/65 | 41          | 34.5/119 | 46          | 35.1  | 38          | 29.9  | 34          | 31.5  |
| Amoxicillin<br>Clavulanic acid | 11          | 23.4    | 5           | 7.7   | 10          | 15.2    | 6           | 4.9      | 6           | 4.6   | 8           | 6.3   | 2           | 1.8   |
| Cefovecin                      | 13          | 27.7    | 4           | 6.2   | 9           | 13.6    | 5           | 4.1      | 6           | 4.6   | 8           | 6.3   | 2           | 1.8   |
| Enrofloxacin                   | 5           | 10.6    | 2           | 3.1   | 9           | 13.6    | 3           | 2.5      | 2           | 1.5   | 5           | 3.9   | 2           | 1.8   |

**Table S3: *Staphylococcus aureus***

| year                           | 2015 |         | 2016 |         | 2017 |         | 2018 |         | 2019 |         | 2020 |         | 2021 |         |
|--------------------------------|------|---------|------|---------|------|---------|------|---------|------|---------|------|---------|------|---------|
| Frequency (F)<br>Percent (P)   | F    | P       | F    | P       | F    | P       | F    | P       | F    | P       | F    | P       | F    | P       |
| total                          | 59   | 100.0   | 62   | 100.0   | 49   | 100.0   | 75   | 100.0   | 75   | 100.0   | 68   | 100.0   | 76   | 100.0   |
| dog                            | 42   | 71.2    | 41   | 66.1    | 31   | 63.3    | 36   | 48.0    | 42   | 56.0    | 31   | 45.6    | 33   | 43.4    |
| cat                            | 17   | 28.8    | 21   | 33.9    | 18   | 36.7    | 39   | 52.0    | 33   | 44.0    | 37   | 54.4    | 43   | 56.6    |
| Penicillin G                   | 52   | 88.1    | 53   | 85.5    | 31   | 63.3    | 53   | 70.7    | 50   | 66.7    | 51   | 75.0    | 58   | 76.3    |
| Ampicillin canin               | 34   | 81.0/42 | 33   | 80.5/41 | 20   | 64.5/31 | 30   | 83.3/36 | 30   | 71.4/42 | 25   | 80.6/31 | 23   | 69.7/33 |
| Ampicillin felin               | 12   | 70.6/17 | 19   | 90.5/21 | 11   | 61.1/18 | 23   | 59.0/39 | 20   | 60.6/33 | 26   | 70.3/37 | 32   | 74.4/43 |
| Amoxicillin<br>Clavulanic acid | 24   | 41.4/58 | 30   | 48.4/62 | 4    | 8.2/49  | 14   | 19.2/73 | 19   | 25.7/74 | 17   | 25.0/68 | 9    | 12.0/75 |
| Cefovecin                      | 25   | 42.4    | 31   | 50.0    | 5    | 10.2    | 15   | 20.0    | 19   | 25.3    | 15   | 22.1    | 9    | 11.8    |
| Enrofloxacin                   | 12   | 20.3    | 19   | 30.6    | 5    | 10.2    | 8    | 10.7    | 7    | 9.3     | 9    | 13.2    | 3    | 3.9     |

**Table S4:** canine *E. coli* of the urinary tract

| year                           | 2015 |       | 2016 |       | 2017 |       | 2018 |       | 2019 |       | 2020 |       | 2021 |       |
|--------------------------------|------|-------|------|-------|------|-------|------|-------|------|-------|------|-------|------|-------|
| Frequency (F)<br>Percent (P)   | F    | P     | F    | P     | F    | P     | F    | P     | F    | P     | F    | P     | F    | P     |
| dog                            | 37   | 100.0 | 44   | 100.0 | 46   | 100.0 | 55   | 100.0 | 59   | 100.0 | 57   | 100.0 | 34   | 100.0 |
| Ampicillin                     | 9    | 24.3  | 12   | 27.3  | 18   | 39.1  | 17   | 30.9  | 12   | 20.3  | 13   | 23.2  | 9    | 26.5  |
| Amoxicillin<br>Clavulanic acid | 2    | 5.4   | 1    | 2.3   | 5    | 10.9  | 6    | 10.9  | 3    | 5.1   | 6    | 10.7  | 3    | 8.8   |
| Cefovecin                      | 4    | 10.8  | 10   | 22.7  | 9    | 19.6  | 7    | 12.7  | 3    | 5.1   | 3    | 5.4   | 1    | 2.9   |
| Enrofloxacin                   | 8    | 21.6  | 9    | 20.5  | 10   | 21.7  | 9    | 16.4  | 4    | 6.8   | 4    | 7.1   | 2    | 5.9   |

**Table S5: *E. coli* of soft and skin tissue**

| year                         | 2015 |       | 2016 |       | 2017 |       | 2018 |       | 2019 |       | 2020 |       | 2021 |       |
|------------------------------|------|-------|------|-------|------|-------|------|-------|------|-------|------|-------|------|-------|
| Frequency (F)<br>Percent (P) | F    | P     | F    | P     | F    | P     | F    | P     | F    | P     | F    | P     | F    | P     |
| total                        | 179  | 100.0 | 219  | 100.0 | 187  | 100.0 | 349  | 100.0 | 316  | 100.0 | 307  | 100.0 | 305  | 100.0 |
| dog                          | 148  | 82.8  | 187  | 85.4  | 148  | 79.1  | 262  | 75.1  | 239  | 75.6  | 233  | 75.9  | 240  | 78.7  |
| cat                          | 31   | 17.2  | 32   | 14.6  | 39   | 20.9  | 87   | 24.9  | 77   | 24.4  | 74   | 24.1  | 65   | 21.3  |
| Cefovecin                    | 50   | 27.8  | 74   | 33.8  | 26   | 13.9  | 76   | 21.8  | 25   | 7.9   | 39   | 12.7  | 35   | 11.5  |
| Enrofloxacin                 | 30   | 16.7  | 26   | 11.9  | 26   | 13.9  | 27   | 7.7   | 25   | 7.9   | 16   | 5.2   | 28   | 9.2   |

**Table S6: *Proteus mirabilis***

| year                         | 2015 |       | 2016 |        | 2017 |       | 2018 |       | 2019 |       | 2020 |       | 2021 |       |
|------------------------------|------|-------|------|--------|------|-------|------|-------|------|-------|------|-------|------|-------|
| Frequency (F)<br>Percent (P) | F    | P     | F    | P      | F    | P     | F    | P     | F    | P     | F    | P     | F    | P     |
| total                        | 51   | 100.0 | 60   | 100.g0 | 53   | 100.0 | 90   | 100.0 | 83   | 100.0 | 67   | 100.0 | 73   | 100.0 |
| dog                          | 48   | 94.1  | 57   | 95.0   | 49   | 92.5  | 82   | 91.1  | 79   | 95.2  | 60   | 89.6  | 67   | 91.8  |
| cat                          | 3    | 5.9   | 3    | 5.0    | 4    | 7.5   | 8    | 8.9   | 4    | 4.8   | 7    | 10.4  | 6    | 8.2   |
| Cefovecin                    | 12   | 23.5  | 21   | 35.0   | 6    | 11.3  | 20   | 22.2  | 12   | 14.5  | 9    | 13.4  | 11   | 15.1  |
| Enrofloxacin                 | 5    | 9.8   | 7    | 11.7   | 8    | 15.1  | 8    | 8.9   | 8    | 9.6   | 6    | 9.0   | 4    | 5.5   |

**Table S7: *Klebsiella* spp.**

| <b>year</b>                  | <b>2015</b> |       | <b>2016</b> |       | <b>2017</b> |       | <b>2018</b> |       | <b>2019</b> |       | <b>2020</b> |       | <b>2021</b> |       |
|------------------------------|-------------|-------|-------------|-------|-------------|-------|-------------|-------|-------------|-------|-------------|-------|-------------|-------|
| Frequency (F)<br>Percent (P) | F           | P     | F           | P     | F           | P     | F           | P     | F           | P     | F           | P     | F           | P     |
| total                        | 18          | 100.0 | 22          | 100.0 | 19          | 100.0 | 40          | 100.0 | 37          | 100.0 | 41          | 100.0 | 29          | 100.0 |
| dog                          | 17          | 94.4  | 22          | 100.0 | 16          | 84.2  | 36          | 90.0  | 33          | 89.2  | 34          | 82.9  | 26          | 89.7  |
| cat                          | 1           | 5.6   | 0           | 0     | 3           | 15.8  | 4           | 10.0  | 4           | 10.8  | 7           | 17.1  | 3           | 10.3  |
| Cefovecin                    | 3           | 16.7  | 7           | 31.8  | 2           | 10.5  | 4           | 10.0  | 7           | 18.9  | 4           | 9.8   | 6           | 20.7  |
| Enrofloxacin                 | 0           | 0     | 1           | 4.5   | 2           | 10.5  | 0           | 0     | 0           | 0     | 3           | 7.3   | 1           | 3.4   |

**Table S8: *Pasteurella multocida***

| <b>year</b>                    | <b>2015</b> |       | <b>2016</b> |       | <b>2017</b> |       | <b>2018</b> |       | <b>2019</b> |       | <b>2020</b> |       | <b>2021</b> |       |
|--------------------------------|-------------|-------|-------------|-------|-------------|-------|-------------|-------|-------------|-------|-------------|-------|-------------|-------|
| Frequency (F)<br>Percent (P)   | F           | P     | F           | P     | F           | P     | F           | P     | F           | P     | F           | P     | F           | P     |
| total                          | 63          | 100.0 | 73          | 100.0 | 91          | 100.0 | 188         | 100.0 | 189         | 100.0 | 186         | 100.0 | 174         | 100.0 |
| dog                            | 11          | 17.5  | 26          | 35.6  | 28          | 30.8  | 26          | 13.8  | 27          | 14.3  | 23          | 12.4  | 33          | 19.0  |
| cat                            | 52          | 82.5  | 47          | 64.4  | 63          | 69.2  | 162         | 86.2  | 162         | 85.7  | 163         | 87.6  | 141         | 81.0  |
| Ampicillin                     | 0           | 0     | 3           | 4.1   | 2           | 2.2   | 13          | 6.9   | 2           | 1.1   | 4           | 2.2   | 3           | 1.7   |
| Amoxicillin<br>Clavulanic acid | 0           | 0     | 1           | 1.4   | 1           | 1.1   | 1           | 0.5   | 0           | 0     | 1           | 0.5   | 0           | 0     |
| Cefovecin                      | 3           | 4.8   | 3           | 4.3   | 1           | 1.1   | 12          | 6.5   | 2           | 1.1   | 2           | 1.1   | 2           | 1.1   |
| Enrofloxacin                   | 0           | 0     | 0           | 0     | 1           | 1.1   | 1           | 0.5   | 1           | 0.5   | 0           | 0     | 2           | 1.1   |



**Table S9:  $\beta$ -hemolytic *Streptococcus* spp.**

| <b>year</b>                    | <b>2015</b> |       | <b>2016</b> |       | <b>2017</b> |       | <b>2018</b> |       | <b>2019</b> |       | <b>2020</b> |       | <b>2021</b> |       |
|--------------------------------|-------------|-------|-------------|-------|-------------|-------|-------------|-------|-------------|-------|-------------|-------|-------------|-------|
| Frequency (F)<br>Percent (P)   | F           | P     | F           | P     | F           | P     | F           | P     | F           | P     | F           | P     | F           | P     |
| total                          | 137         | 100.0 | 146         | 100.0 | 139         | 100.0 | 232         | 100.0 | 215         | 100.0 | 202         | 100.0 | 156         | 100.0 |
| dog                            | 125         | 91.2  | 143         | 97.9  | 125         | 89.9  | 204         | 87.9  | 184         | 85.6  | 174         | 86.1  | 131         | 84.0  |
| cat                            | 12          | 8.8   | 3           | 2.1   | 14          | 10.1  | 28          | 12.1  | 31          | 14.4  | 28          | 13.9  | 25          | 16.0  |
| Penicillin G                   | 0           | 0     | 0           | 0     | 0           | 0     | 0           | 0     | 0           | 0     | 0           | 0     | 0           | 0     |
| Ampicillin                     | 0           | 0     | 0           | 0     | 0           | 0     | 0           | 0     | 0           | 0     | 0           | 0     | 0           | 0     |
| Amoxicillin<br>Clavulanic acid | 0           | 0     | 0           | 0     | 0           | 0     | 0           | 0     | 0           | 0     | 0           | 0     | 0           | 0     |
| Cefovecin                      | 0           | 0     | 0           | 0     | 0           | 0     | 0           | 0     | 0           | 0     | 0           | 0     | 0           | 0     |
| Enrofloxacin                   | 0           | 0     | 0           | 0     | 0           | 0     | 0           | 0     | 0           | 0     | 2           | 1.0   | 0           | 0     |
